# Supplementary material
Source: Springer Nature journal article supplement (https://www.springermedizin.de/resource/supplementary/12985_2008_524_MOESM1_ESM.pdf/9608108)
Supplement: MOESM1 [file 9608108]

|               |            |            |              |            |            |             |          |
|---------------|------------|------------|--------------|------------|------------|-------------|----------|
| DV-1_AB195673 | GAGAGACCAG | AGATCCTGCT | GTCTCTACAG   | CATCATTCCA | GGCACAGAAC | GCCAGAAAAT  | GGAATGGT |
| 0623915       | .....      | .....      | .....        | .....      | .....      | .....       | .....    |
| 0631278       | .....      | .....      | .....        | .....      | .....      | .....       | .....    |
| 0631290       | .....      | .....      | .....        | .....      | .....      | .....       | .....    |
| 055290        | .....      | .....      | .....        | .....      | .....      | .....       | .....    |
| DV-2_AF359579 | ..A.....   | .....      | .....CT..... | .....      | .....      | .....       | .....    |
| P23085        | ..A.....   | .....      | .....CT..... | .....      | .....      | .....       | .....    |
| 803347        | ..A.....   | .....      | .....CT..... | .....      | .....      | .....       | .....    |
| 939548        | ..A.....   | .....      | .....CT..... | .....      | .....      | .....       | .....    |
| 057561        | ..A.....   | .....      | .....CT..... | .....      | .....      | .....       | .....    |
| DV-3_AB189125 | .....      | .....      | .....CT..... | .....      | .....      | .....       | .....    |
| 059826        | .....      | .....      | .....CT..... | .....      | .....      | .....       | .....    |
| 059827        | .....      | .....      | .....CT..... | .....      | .....      | .....       | .....    |
| DV-4_AY762086 | ..A.....   | .....      | .....G.....  | .....      | .....      | G...GC..G.. | ...T...  |
| 611318        | ..A.....   | .....      | .....        | .....      | .....      | G...GC..G.G | ...T...  |
| 631306        | ..A.....   | .....      | .....        | .....      | .....      | G...GC..G.G | ...T...  |
| 624000        | ..A.....   | .....      | .....        | .....      | .....      | G...GC..G.G | ...T...  |

**Forward Primer**

**Probe**

**Reverse Primer**
